# Supplementary material
Source: publisher figshare collection journal article supplement (https://acs.figshare.com/ndownloader/files/5302435)
Supplement: Supplementary file 1 [file 5302435]

Compound	SMILES
5	N[C@@](C(O)=O)([H])CC(O)=O
ent-5	N[C@](C(O)=O)([H])CC(O)=O
6.HCl	[NH3+][C@@](C(OC)=O)([H])CC(OC)=O.[Cl-]
ent-6.HCl	[NH3+][C@](C(OC)=O)([H])CC(OC)=O.[Cl-]
7a	O=C(CCl)N(CC1=CC=CC=C1)[C@](CC(OC)=O)([H])C(OC)=O
ent-7a	O=C(CCl)N(CC1=CC=CC=C1)[C@@](CC(OC)=O)([H])C(OC)=O
7c	O=C(CCl)N(CC1=CC=CC2=C1C=CC=C2)[C@](CC(OC)=O)([H])C(OC)=O
ent-7c	O=C(CCl)N(CC1=CC=CC2=C1C=CC=C2)[C@@](CC(OC)=O)([H])C(OC)=O
7d	O=C(CCl)N(CC1=CC=C(C2=CC=CC=C2)C=C1)[C@](CC(OC)=O)([H])C(OC)=O
ent-7d	O=C(CCl)N(CC1=CC=C(C2=CC=CC=C2)C=C1)[C@@](CC(OC)=O)([H])C(OC)=O
8a	O=C(N(CC1=CC=CC=C1)[C@@]2([H])CC(OC)=O)CN(CC3CCCCC3)C2=O
ent-8a	O=C(N(CC1=CC=CC=C1)[C@]2([H])CC(OC)=O)CN(CC3CCCCC3)C2=O
8b	CN(CC(N(CC1=CC=CC=C1)[C@@]2([H])CC(OC)=O)=O)C2=O
8c	O=C1[C@@](CC(OC)=O)([H])N(CC2=CC=CC3=C2C=CC=C3)C(CN1CC4CCCCC4)=O
ent-8c	O=C1[C@](CC(OC)=O)([H])N(CC2=CC=CC3=C2C=CC=C3)C(CN1CC4CCCCC4)=O
8d	O=C(N(CC1=CC=C(C2=CC=CC=C2)C=C1)[C@@]3([H])CC(OC)=O)CN(CC4CCCCC4)C3=O
ent-8d	O=C(N(CC1=CC=C(C2=CC=CC=C2)C=C1)[C@]3([H])CC(OC)=O)CN(CC4CCCCC4)C3=O
9a	O=C(N(CC1=CC=CC=C1)[C@@]2([H])CC(N(C)OC)=O)CN(CC3CCCCC3)C2=O
ent-9a	O=C(N(CC1=CC=CC=C1)[C@]2([H])CC(N(C)OC)=O)CN(CC3CCCCC3)C2=O
9b	CN(CC(N(CC1=CC=CC=C1)[C@@]2([H])CC(N(C)OC)=O)=O)C2=O
10b	CN(CC(N(CC1=CC=CC=C1)[C@@]2([H])CCO)=O)C2=O
11a	O=C(N(CC1=CC=CC=C1)[C@@]2([H])CC([H])=O)CN(CC3CCCCC3)C2=O
ent-11a	O=C([H])C[C@@]1([H])N(CC2=CC=CC=C2)C(CN(CC3CCCCC3)C1=O)=O
11b	CN(CC(N(CC1=CC=CC=C1)[C@@]2([H])CC([H])=O)=O)C2=O
12a	O=C(C(N1CC2=CC=CC=C2)C[C@]3(O[Si](C)(C)C)OC)N(CC4CCCCC4)C3C1=O
ent-12a	O=C(C(N1CC2=CC=CC=C2)C[C@@]3(O[Si](C)(C)C)OC)N(CC4CCCCC4)C3C1=O
12b	O=C(C(N1CC2=CC=CC=C2)C[C@]3(O[Si](C)(C)C)OC)N(C)C3C1=O
12c	O=C(C(N1CC2=C(C=CC=C3)C3=CC=C2)C[C@]4(O[Si](C)(C)C)OC)N(CC5CCCCC5)C4C1=O
ent-12c	O=C(C(N1CC2=CC=CC3=C2C=CC=C3)C[C@@]4(O[Si](C)(C)C)OC)N(CC5CCCCC5)C4C1=O
12d	O=C(C(N1CC2=CC=C(C3=CC=CC=C3)C=C2)C[C@]4(O[Si](C)(C)C)OC)N(CC5CCCCC5)C4C1=O
ent-12d	O=C(C(N1CC2=CC=C(C3=CC=CC=C3)C=C2)C[C@@]4(O[Si](C)(C)C)OC)N(CC5CCCCC5)C4C1=O
13a	O=C(C(N1CC2=CC=CC=C2)CC3=O)N(CC4CCCCC4)C3C1=O
ent-13a	O=C(C(N1CC2=CC=CC=C2)CC3=O)N(CC4CCCCC4)C3C1=O
13b	O=C(C(N1CC2=CC=CC=C2)CC3=O)N(C)C3C1=O
13c	O=C(C(N1CC2=C(C=CC=C3)C3=CC=C2)CC4=O)N(CC5CCCCC5)C4C1=O
ent-13c	O=C(C(N1CC2=CC=CC3=C2C=CC=C3)CC4=O)N(CC5CCCCC5)C4C1=O
13d	O=C(C(N1CC2=CC=C(C3=CC=CC=C3)C=C2)CC4=O)N(CC5CCCCC5)C4C1=O
ent-13d	O=C(C(N1CC2=CC=C(C3=CC=CC=C3)C=C2)CC4=O)N(CC5CCCCC5)C4C1=O
14a	OC1([H])C(CN2CC3=CC=CC=C3)N(CC4CCCCC4)CC2C1
ent-14a	OC1([H])C(CN2CC3=CC=CC=C3)N(CC4CCCCC4)CC2C1
14b	CN1CC2CC(O)([H])C1CN2CC3=CC=CC=C3
14c	OC1([H])C(CN2CC3=C(C=CC=C4)C4=CC=C3)N(CC5CCCCC5)CC2C1
ent-14c	OC1([H])C(CN2CC3=CC=CC4=C3C=CC=C4)N(CC5CCCCC5)CC2C1
14d	OC1([H])C(CN2CC3=CC=C(C4=CC=CC=C4)C=C3)N(CC5CCCCC5)CC2C1
ent-14d	OC1([H])C(CN2CC3=CC=C(C4=CC=CC=C4)C=C3)N(CC5CCCCC5)CC2C1
15a	[H]C1(O)C(CN2CC3=CC=CC=C3)N(CC4CCCCC4)CC2C1
ent-15a	[H]C1(O)C(CN2CC3=CC=CC=C3)N(CC4CCCCC4)CC2C1
15b	CN1CC2CC([H])(O)C1CN2CC3=CC=CC=C3
15c	[H]C1(O)C(CN2CC3=C(C=CC=C4)C4=CC=C3)N(CC5CCCCC5)CC2C1
ent-15c	[H]C1(O)C(CN2CC3=CC=CC4=C3C=CC=C4)N(CC5CCCCC5)CC2C1
15d	[H]C1(O)C(CN2CC3=CC=C(C4=CC=CC=C4)C=C3)N(CC5CCCCC5)CC2C1
ent-15d	[H]C1(O)C(CN2CC3=CC=C(C4=CC=CC=C4)C=C3)N(CC5CCCCC5)CC2C1
16	NC(C(O)=O)CCC(O)=O
17.HCl	[NH3+][C@@](C(OC)=O)([H])CCC(OC)=O.[Cl-]
18	O=C(CCl)N(CC1=CC=CC=C1)[C@](CCC(OC)=O)([H])C(OC)=O
19	OCCC[C@]1([H])N(CC2=CC=CC=C2)C(CN(CC3CCCCC3)C1=O)=O
20	O=C(C(N1CC2=CC=CC=C2)CC[C@]3(O[Si](C)(C)C)OC)N(CC4CCCCC4)C3C1=O
21	O=C(C(N1CC2=CC=CC=C2)CCC3=O)N(CC4CCCCC4)C3C1=O
22a	OC1([H])C(CN2CC3=CC=CC=C3)N(CC4CCCCC4)CC2CC1
23a	[H]C1(O)C(CN2CC3=CC=CC=C3)N(CC4CCCCC4)CC2CC1
